# Supplementary material for: Stacking Multiple Genes Improves Resistance to Chilo suppressalis, Magnaporthe oryzae, and Nilaparvata lugens in Transgenic Rice
Source: MDPI journal article supplement (doi:10.3390/genes14051070), 2023-05-12
Supplement: s1 [file s1]

Supplementary Materials

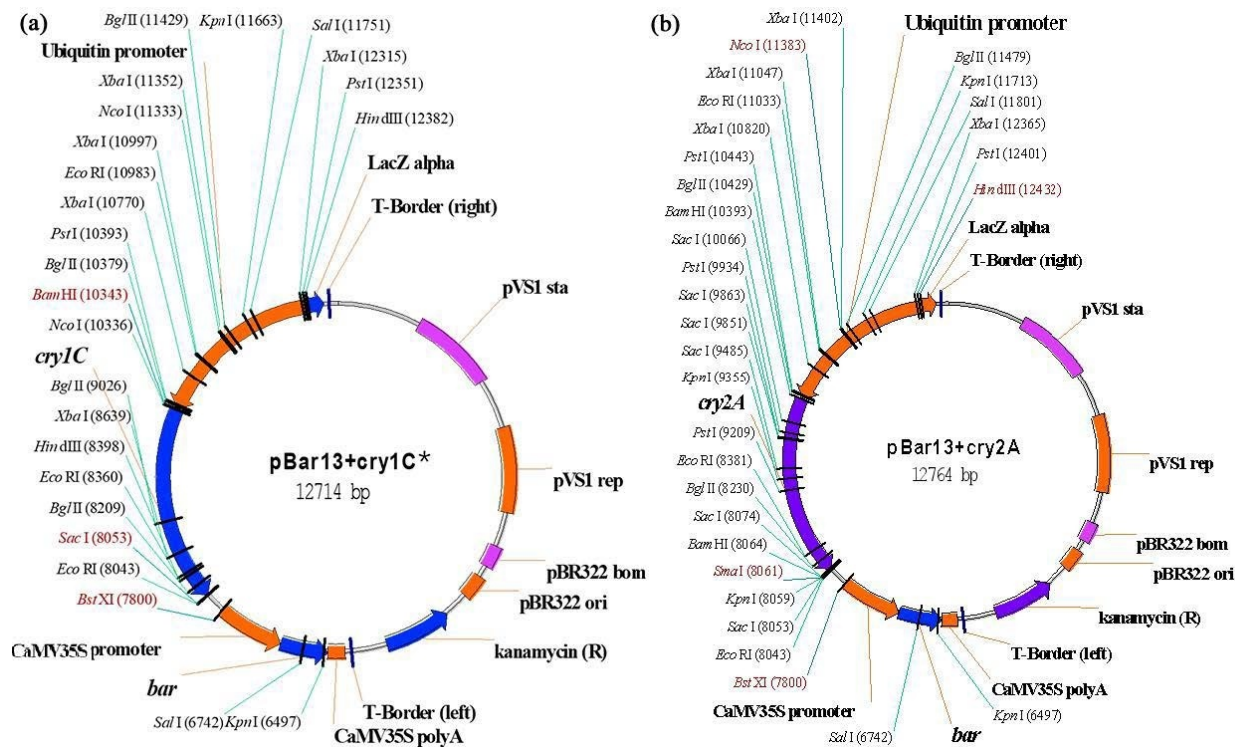

**Figure S1. Construction of *CRY1C* and *CRY2A* vectors.** The *CRY1C* and *CRY2A* gene was driven by a Ubiquitin promoter and terminated by the nopaline synthase (Nos) terminator. T-Border (left): left border of T-DNA region; T-Border (right): right border of T-DNA region.

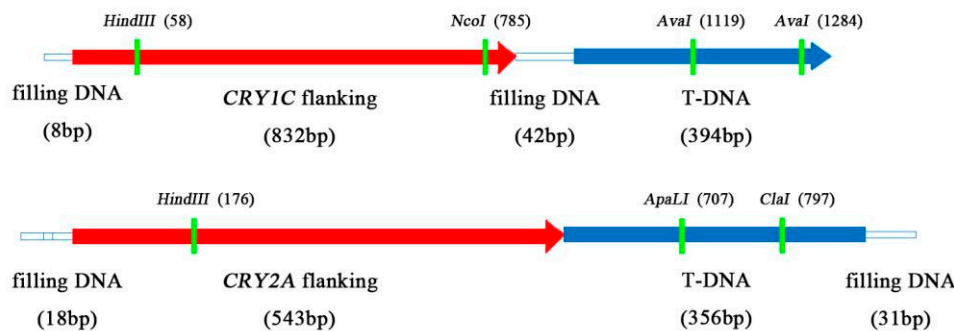

**Figure S2. Schematic map of flanking sequences of *CRY1C* and *CRY2A* insertion site.**

**Table S1 PCR primers used in this study**

| Gene          | Primer   | Primer sequence(5'-3') | Gene length | Tm(°C) |
|---------------|----------|------------------------|-------------|--------|
| <i>CRY 1C</i> | CRY 1C-F | TTCTACTGGGGAGGACATCG   | 799bp       | 57     |
|               | CRY 1C-R | CGGTATCTTGGGTGATTGG    |             |        |

|               |          |                             |       |    |
|---------------|----------|-----------------------------|-------|----|
| <i>CRY 2A</i> | CRY 2A-F | CGTGTCAATGCTGACCTGAT        | 600bp | 58 |
|               | CRY 2A-R | GATGCCGGACAGGATGTAGT        |       |    |
| <i>Pib</i>    | Pibgom-F | GAACAATGCCCCAAACTTGAGA      | 360bp | 55 |
|               | Pibgom-R | GGGTCCACATGTCAGTGAGC        |       |    |
|               | Lys145-F | TCGGTGCCTCGGTAGTCAGT        | 800bp | 61 |
|               | Lys145-R | GGGAAGCGGATCCTAGGTCT        |       |    |
| <i>Pikm</i>   | DKm1-F   | CTGGAGAGCTTCCGTGTCGAC       | 191bp | 60 |
|               | DKm1-R   | TCTTCACGACGTCAATGGTGGC      |       |    |
|               | DKm2-F   | GTTGTTCACCTCCGTATCTACTACGTC | 223bp | 60 |
|               | DKm2-R   | TTCTCCGTGATCACAGCAACG       |       |    |
| <i>Bph29</i>  | Bph29-F  | GACACCGTCTCCTTCTGCC         | 570bp | 56 |
|               | Bph29-R  | TTGCTTCCATCGTCCAATT         |       |    |

**Table S2 Physical locations of molecular markers**

| Chr   | Chromosome length/Mb | Marker_num | Average length between |
|-------|----------------------|------------|------------------------|
|       |                      |            | markers/Mb             |
| chr1  | 435.10               | 58         | 7.50                   |
| chr2  | 358.50               | 58         | 6.18                   |
| chr3  | 363.00               | 57         | 6.37                   |
| chr4  | 351.80               | 49         | 7.18                   |
| chr5  | 296.70               | 43         | 6.90                   |
| chr6  | 309.80               | 43         | 7.20                   |
| chr7  | 295.60               | 47         | 6.29                   |
| chr8  | 280.70               | 46         | 6.10                   |
| chr9  | 229.20               | 35         | 6.55                   |
| chr10 | 227.50               | 40         | 5.69                   |
| chr11 | 284.00               | 41         | 6.93                   |
| chr12 | 273.00               | 43         | 6.35                   |

**Table S3 Resistant level criteria of *Chilo suppressalis***

| Corrected larval mortality (%) | Resistance level         |
|--------------------------------|--------------------------|
| 85-100                         | Highly Resistant(HR)     |
| 60-85                          | Resistant(R)             |
| 20-60                          | Moderately Resistant(MR) |
| 0-20                           | Sensitive(S)             |

**Table S4 PDA medium formula and rice bran medium**

| Type             | Formula                                                                 |
|------------------|-------------------------------------------------------------------------|
| PDA medium       | Potato 200g, sucrose 20g, agar 20g,Dd H <sub>2</sub> O 1000ml           |
| Rice bran medium | Rice bran 20g ,agar 20g , yeast extract 2.5g,Dd H <sub>2</sub> O 1000ml |

**Table S5 Identification of resistance to *Magnaporthe oryzae* criteria**

| Situation at onset                                                                                                                                        | Resistance level         |
|-----------------------------------------------------------------------------------------------------------------------------------------------------------|--------------------------|
| Without infection or any scab                                                                                                                             | Highly Resistant(HR)     |
| With scattered brown spots less than 0.5 mm in diameter.                                                                                                  | Resistant(R)             |
| Exist a few brown spots with a diameter of about 0.5 to 1 mm.                                                                                             | Moderately Resistant(MR) |
| Round to elliptical lesions less than 3 mm in diameter were present; Central gray-white, margin brown.                                                    | Moderately Sensitive(MS) |
| Typical spindle-shaped rice blast spot, diameter 3mm or more, with slightly fused or unfused plaques.                                                     | Sensitive(S)             |
| Typical spindle-shaped rice blast spot, diameter 3mm or longer, spots confluent into sheets, resulting in the apical or integral death of the leaf blade. | Highly Sensitive(HS)     |

**Table S6 Identification of resistance to *Nilaparvata lugens* criteria**

| Seedling mortality(%) | Resistance level         |
|-----------------------|--------------------------|
| <1.0                  | Immune(I)                |
| 1.1-10.0              | Highly Resistant(HR)     |
| 10.1-30.0             | Resistant(R)             |
| 30.1-50.0             | Moderately Resistant(MR) |
| 50.1-70.0             | Sensitive(S)             |
| >70.1                 | Highly Sensitive(HS)     |

**Table S7 Measurement of agronomic traits investigation method**

| Agronomic traits | Methods of investigating |
|------------------|--------------------------|
|------------------|--------------------------|

|                          |                                                               |
|--------------------------|---------------------------------------------------------------|
| Plant height (cm)        | The distance from the ground to the highest ear tip per plant |
| Effective panicle number | Number of ears with more than 10 seeds per plant              |
| Panicle length(cm)       | Length from ear neck to ear tip                               |
| Total grain number       | Total grain number/effective ear number per plant             |
| Number of solid grains   | Grain number per plant/effective ear number per plant         |
| Seed setting rate(%)     | Grain number per plant/total grain number per plant           |
| 1000-grain weight(g)     | (seed weight per plant/seed number per plant) ×1000           |
| Yield per plant(g)       | Weight of all grains per plant                                |

**Table S8 Response rate of each strains**

| Transgenic restorer line | Number of SSR markers | Number of polymorphic SSR marker | Polymorphic marker rate (%) | Theoretical response rate (%) | Actual response rate (%) |
|--------------------------|-----------------------|----------------------------------|-----------------------------|-------------------------------|--------------------------|
| CH121TJH                 | 560                   | 53                               | 9.46                        | 83.34                         | 85.85                    |
| CH891TJH                 | 560                   | 49                               | 8.75                        | 83.34                         | 90.82                    |
| R205XTJH                 | 560                   | 55                               | 9.82                        | 83.34                         | 89.09                    |

**Table S9 *C. suppressalis* corrected larval mortality rate**

| Variety  | R.gene                                             | Number of dead larval | Mortality rate(%) | Corrected mortality rate(%) | Resistance level     |
|----------|----------------------------------------------------|-----------------------|-------------------|-----------------------------|----------------------|
| CH121    | /                                                  | 2.00                  | 6.67              | /                           | Sensitive(S)         |
| CH121TJH | CRY 1C, <i>Pibgom</i> , <i>Pikm</i> , <i>Bph29</i> | 26.67                 | 88.90             | 88.11                       | Highly Resistant(HR) |
| CH891    | /                                                  | 1.67                  | 5.57              | /                           | Sensitive(S)         |
| CH891TJH | CRY 2A, <i>Pibgom</i> , <i>Pikm</i> , <i>Bph29</i> | 25.00                 | 83.33             | 82.35                       | Resistant(R)         |
| R205X    | /                                                  | 1.33                  | 4.33              | /                           | Sensitive(S)         |
| R205XTJH | CRY 2A, <i>Pibgom</i> , <i>Pikm</i> , <i>Bph29</i> | 24.67                 | 82.23             | 81.41                       | Resistant(R)         |

**Table S10 The *M. oryzae* diseased spot accounts for the leaf area**

| Variety  | Area 1 | Area 2 | Area 3 |
|----------|--------|--------|--------|
| LTH      | 83%    | 80%    | 89%    |
| CK30     | 0      | 0      | 0      |
| CH121    | 30%    | 35%    | 28%    |
| CH891    | 25%    | 25%    | 27%    |
| R205X    | 20%    | 25%    | 30%    |
| CH121TJH | 8%     | 6%     | 5%     |
| CH891TJH | 0      | 1%     | 1%     |

|          |    |    |    |
|----------|----|----|----|
| R205XTJH | 5% | 7% | 3% |
|----------|----|----|----|

**Table S11 Mortality rate in assessment of *N. lugens* resistance at the seedling stage**

| Variety  | Number of dead seedlings | Number of total seedlings | mortality rate(%) | Resistance level     |
|----------|--------------------------|---------------------------|-------------------|----------------------|
| CH121    | 24.67±2.49               | 28                        | 88.09±8.91        | Highly Sensitive(HS) |
| CH121TJH | 2.33±2.05                | 28                        | 8.33±2.34         | Highly Resistant(HR) |
| CH891    | 18.33±1.25               | 28                        | 65.48±4.46        | Sensitive(S)         |
| CH891TJH | 5.33±1.25                | 28                        | 19.05±4.45        | Resistant(R)         |
| R205X    | 14.33±1.25               | 28                        | 51.19±4.45        | Sensitive(S)         |
| R205XTJH | 7.33±1.25                | 28                        | 26.19±4.45        | Resistant(R)         |
| PSL      | 0.00                     | 28                        | 0.00              | Immune(I)            |
| TN1      | 26.67±1.25               | 28                        | 94.05±3.37        | Highly Sensitive(HS) |
